# Supplementary material for: Association of Health Status Scores With Cardiovascular and Limb Outcomes in Patients With Symptomatic Peripheral Artery Disease: Insights From the EUCLID (Examining Use of Ticagrelor in Symptomatic Peripheral Artery Disease) Trial
Source: PubMed Central journal article supplement — J Am Heart Assoc. 2020 Sep 13;9(19):e016573. doi: 10.1161/JAHA.120.016573 (PMC7792388; doi:10.1161/jaha.120.016573), 2020-09-13
Supplement: JAH3-9-e016573-s001.pdf [file JAH3-9-e016573-s001.pdf]

# **SUPPLEMENTAL MATERIAL**

**Table S1. Adjustment Variables used for the Cox Proportional Hazards Model by Score and Outcome.**

|                                                      | <b>EQ-5D Index Score</b>                                                                                                                                                                                                             | <b>EQ-5D VAS</b>                                                                                                                                                                                         | <b>PAQ</b>                                                                                                                                                                       |
|------------------------------------------------------|--------------------------------------------------------------------------------------------------------------------------------------------------------------------------------------------------------------------------------------|----------------------------------------------------------------------------------------------------------------------------------------------------------------------------------------------------------|----------------------------------------------------------------------------------------------------------------------------------------------------------------------------------|
| <b>MACE</b>                                          | Rutherford score, sex, inclusion criteria, region, prior stroke, prior carotid revascularization, prior MI, prior PCI, prior CABG, diabetes, statin use, tobacco use, prior major amputation, prior minor amputation, age, ABI, eGFR | Rutherford score, sex, inclusion criteria, region, prior stroke, prior carotid revascularization, prior MI, prior PCI, diabetes, statin use, tobacco use, prior minor amputation, age, ABI, weight, eGFR | Rutherford score, sex, prior stroke, prior carotid revascularization, prior MI, prior PCI, prior CABG, diabetes, statin use, tobacco use, prior minor amputation, age, ABI, eGFR |
| <b>MALE</b>                                          | Rutherford score, inclusion criteria, prior carotid revascularization, prior carotid stenosis, diabetes, ARB use, prior major or minor amputation, statin use, and ABI                                                               | Rutherford score, inclusion criteria, prior carotid revascularization, prior carotid stenosis, diabetes, ARB use, prior major or minor amputation, statin use, and ABI                                   | Rutherford score, inclusion criteria, prior carotid revascularization, diabetes, prior major amputation, statin use, ABI, region and tobacco use                                 |
| <b>Lower extremity revascularization</b>             | Inclusion criteria, region, ABI, tobacco use, diabetes, prior clopidogrel use, prior aspirin use                                                                                                                                     | Inclusion criteria, region, ABI, tobacco use, diabetes, prior clopidogrel use, prior aspirin use                                                                                                         | Inclusion criteria, region, ABI, tobacco use, prior clopidogrel use, eGFR                                                                                                        |
| <b>Major Amputation</b>                              | Rutherford score, inclusion criteria, prior CABG, diabetes, statin use, prior major amputation, prior minor amputation, ABI, weight                                                                                                  | Rutherford score, inclusion criteria, prior carotid stenosis, prior carotid revascularization, diabetes, statin use, prior major amputation, prior minor amputation, ABI, weight                         | Rutherford score, prior carotid revascularization, diabetes, prior major amputation, prior minor amputation, ABI                                                                 |
| <b>Acute limb ischemia requiring hospitalization</b> | Inclusion criteria, ABI, hypertension, prior carotid revascularization, ARB use                                                                                                                                                      | Inclusion criteria, ABI, hypertension, prior carotid revascularization, ARB use                                                                                                                          | Inclusion criteria, prior carotid revascularization, statin use, eGFR                                                                                                            |
|                                                      |                                                                                                                                                                                                                                      |                                                                                                                                                                                                          |                                                                                                                                                                                  |
|                                                      | <b>Change in EQ-5D Index Score</b>                                                                                                                                                                                                   | <b>Change in EQ-5D VAS</b>                                                                                                                                                                               | <b>N/A</b>                                                                                                                                                                       |
| <b>MACE</b>                                          | Rutherford score, sex, inclusion criteria, region, prior stroke, prior carotid revascularization, prior                                                                                                                              | Rutherford score, sex, inclusion criteria, region, prior stroke, prior carotid revascularization, prior                                                                                                  |                                                                                                                                                                                  |

|                                                      |                                                                                                                                                                        |                                                                                                                                                                                  |  |
|------------------------------------------------------|------------------------------------------------------------------------------------------------------------------------------------------------------------------------|----------------------------------------------------------------------------------------------------------------------------------------------------------------------------------|--|
|                                                      | MI, prior PCI, prior CABG, diabetes, statin use, tobacco use, prior major amputation, prior minor amputation, age, ABI, eGFR                                           | MI, prior PCI, diabetes, statin use, tobacco use, prior minor amputation, age, ABI, weight, eGFR                                                                                 |  |
| <b>MALE</b>                                          | Rutherford score, inclusion criteria, prior carotid revascularization, prior carotid stenosis, diabetes, ARB use, prior major or minor amputation, statin use, and ABI | Rutherford score, inclusion criteria, prior carotid revascularization, prior carotid stenosis, diabetes, ARB use, prior major or minor amputation, statin use, and ABI           |  |
| <b>Lower extremity revascularization</b>             | Inclusion criteria, region, ABI, tobacco use, diabetes, prior clopidogrel use, prior aspirin use                                                                       | Inclusion criteria, region, ABI, tobacco use, diabetes, prior clopidogrel use, prior aspirin use                                                                                 |  |
| <b>Major Amputation</b>                              | Rutherford score, inclusion criteria, prior CABG, diabetes, statin use, prior major amputation, prior minor amputation, ABI, weight                                    | Rutherford score, inclusion criteria, prior carotid stenosis, prior carotid revascularization, diabetes, statin use, prior major amputation, prior minor amputation, ABI, weight |  |
| <b>Acute limb ischemia requiring hospitalization</b> | Inclusion criteria, ABI, hypertension, prior carotid revascularization, ARB use                                                                                        | Inclusion criteria, ABI, hypertension, prior carotid revascularization, ARB use                                                                                                  |  |

ABI indicates ankle brachial index; ARB, angiotensin receptor blocker; CABG, coronary artery bypass grafting; eGFR, estimated glomerular filtration rate; EQ-5D, EuroQol-5D; MI, myocardial infarction; PCI, percutaneous coronary intervention; LER, lower extremity revascularization; MACE, major adverse cardiovascular event; MALE, major adverse limb event; PAQ, Peripheral Artery Questionnaire; VAS, visual analog scale

**Table S2. Baseline Patient Characteristics by Tertile of EQ-5D Index Score.**

| <b>Characteristic</b>                   | <b>0.0 to &lt;0.69<br/>(N=4,231)</b> | <b>0.69 to &lt;0.79<br/>(N=4,369)</b> | <b>0.79 to 1.0<br/>(N=4,617)</b> | <b>P-value<sup>α</sup></b> |
|-----------------------------------------|--------------------------------------|---------------------------------------|----------------------------------|----------------------------|
| Age                                     | 66, 60-73                            | 66, 60-72                             | 66, 61-72                        | 0.876                      |
| Female                                  | 33.1%                                | 26.4%                                 | 24.9%                            | <.001                      |
| Weight, kg                              | 78, 67-89                            | 78, 68-89                             | 75, 65-86                        | <.001                      |
| Inclusion Criteria                      |                                      |                                       |                                  | <.001                      |
| ABI/TBI                                 | 51.4%                                | 47.7%                                 | 32.4%                            |                            |
| ABI value, Mean (SD)                    | 0.62 (0.16)                          | 0.62 (0.15)                           | 0.65 (0.14)                      | <.001                      |
| TBI value, Mean (SD)                    | 0.59 (0.27)                          | 0.48 (0.16)                           | 0.49 (0.17)                      | 0.053                      |
| Prior lower extremity revascularization | 48.6%                                | 52.3%                                 | 67.6%                            |                            |
| ABI value, Mean (SD)                    | 0.73 (0.23)                          | 0.74 (0.22)                           | 0.84 (0.21)                      | <.001                      |
| Limb Symptoms                           |                                      |                                       |                                  | <.001                      |
| Asymptomatic                            | 8.1%                                 | 10.9%                                 | 36.3%                            |                            |
| Mild or Moderate Claudication           | 51.5%                                | 59.8%                                 | 50.2%                            |                            |
| Severe Claudication                     | 33.0%                                | 25.8%                                 | 11.6%                            |                            |
| Pain while at Rest                      | 4.5%                                 | 1.9%                                  | 1.1%                             |                            |
| Major or Minor Tissue Loss              | 3.0%                                 | 1.5%                                  | 0.9%                             |                            |
| Prior Major Amputation                  | 3.9%                                 | 1.8%                                  | 1.1%                             | <.001                      |
| Prior PCI                               | 14.8%                                | 15.4%                                 | 15.7%                            | 0.457                      |
| Prior CABG                              | 10.6%                                | 11.9%                                 | 11.1%                            | 0.147                      |
| <b>Medical History</b>                  |                                      |                                       |                                  |                            |

| <b>Characteristic</b>                     | <b>0.0 to &lt;0.69<br/>(N=4,231)</b> | <b>0.69 to &lt;0.79<br/>(N=4,369)</b> | <b>0.79 to 1.0<br/>(N=4,617)</b> | <b>P-value<sup>α</sup></b> |
|-------------------------------------------|--------------------------------------|---------------------------------------|----------------------------------|----------------------------|
| Stroke                                    | 10.5%                                | 7.1%                                  | 6.9%                             | <.001                      |
| Prior Myocardial Infarction               | 20.2%                                | 17.8%                                 | 16.3%                            | <.001                      |
| Diabetes                                  | 40.9%                                | 38.7%                                 | 34.5%                            | <.001                      |
| Hypertension                              | 80.1%                                | 79.5%                                 | 75.7%                            | <.001                      |
| Hyperlipidemia                            | 73.6%                                | 77.4%                                 | 76.2%                            | <.001                      |
| COPD                                      | 13.3%                                | 11.9%                                 | 8.4%                             | <.001                      |
| Number of Vascular Beds                   |                                      |                                       |                                  | <.001                      |
| 1                                         | 54.7%                                | 55.8%                                 | 58.4%                            |                            |
| ≥2                                        | 45.3%                                | 44.2%                                 | 41.5%                            |                            |
| Tobacco Use                               |                                      |                                       |                                  | <.001                      |
| Current                                   | 29.6%                                | 32.7%                                 | 31.0%                            |                            |
| Former                                    | 43.0%                                | 47.1%                                 | 51.7%                            |                            |
| <b>Medications Prior to Randomization</b> |                                      |                                       |                                  |                            |
| Aspirin                                   | 61.2%                                | 68.3%                                 | 71.0%                            | <.001                      |
| Clopidogrel                               | 32.4%                                | 29.9%                                 | 34.4%                            | <.001                      |
| Statin                                    | 69.7%                                | 74.3%                                 | 75.4%                            | <.001                      |
| ACE Inhibitor                             | 42.3%                                | 43.4%                                 | 37.9%                            | <.001                      |
| ARB                                       | 24.1%                                | 24.3%                                 | 26.0%                            | 0.068                      |

| <b>Characteristic</b> | <b>0.0 to &lt;0.69<br/>(N=4,231)</b> | <b>0.69 to &lt;0.79<br/>(N=4,369)</b> | <b>0.79 to 1.0<br/>(N=4,617)</b> | <b>P-value<sup>α</sup></b> |
|-----------------------|--------------------------------------|---------------------------------------|----------------------------------|----------------------------|
| Cilostazol            | 13.4%                                | 14.4%                                 | 15.6%                            | 0.013                      |

ABI indicates ankle brachial index; ACE, angiotensin converting enzyme; ARB, angiotensin II receptor blocker; CABG, coronary artery bypass grafting; COPD; chronic obstructive pulmonary disease; kg, kilogram; PCI, percutaneous coronary intervention; SD, standard deviation; TBI, toe brachial index

<sup>α</sup>Continuous variables were compared using an ANOVA or Kruskal Wallis test and categorial variables were compared using chi-square or Fisher's exact test.

**Table S3. Baseline Characteristics by Tertile of EQ-5D VAS Score.**

| <b>Characteristic</b>                   | <b>0 to 60<br/>(N=4,683)</b> | <b>61 to 79<br/>(N=3,866)</b> | <b>80 to 100<br/>(N=4,984)</b> | <b>P-value<sup>α</sup></b> |
|-----------------------------------------|------------------------------|-------------------------------|--------------------------------|----------------------------|
| Age                                     | 66, 60-73                    | 66, 60-72                     | 66, 61-72                      | 0.239                      |
| Female                                  | 29.3%                        | 26.0%                         | 29.2%                          | <.001                      |
| Weight, kg                              | 77, 66-89                    | 78, 68-89                     | 76, 66-87                      | <.001                      |
| Inclusion Criteria                      |                              |                               |                                | <.001                      |
| ABI/TBI                                 | 48.2%                        | 46.2%                         | 37.9%                          |                            |
| ABI value, Mean (SD)                    | 0.61 (0.17)                  | 0.63 (0.14)                   | 0.65 (0.14)                    | <.001                      |
| TBI value, Mean (SD)                    | 0.50 (0.19)                  | 0.56 (0.29)                   | 0.51 (0.16)                    | 0.324                      |
| Prior lower extremity revascularization | 51.8%                        | 53.8%                         | 62.1%                          |                            |
| ABI value, Mean (SD)                    | 0.73 (0.24)                  | 0.77 (0.23)                   | 0.81 (0.22)                    | <.001                      |
| Limb Symptoms                           |                              |                               |                                | <.001                      |
| Asymptomatic                            | 10.8%                        | 16.1%                         | 27.6%                          |                            |
| Mild or Moderate Claudication           | 49.6%                        | 56.7%                         | 54.0%                          |                            |
| Severe Claudication                     | 31.9%                        | 24.0%                         | 15.2%                          |                            |
| Pain while at Rest                      | 4.8%                         | 1.5%                          | 1.8%                           |                            |
| Major or Minor Tissue Loss              | 2.8%                         | 1.7%                          | 1.2%                           |                            |
| Prior Major Amputation                  | 3.2%                         | 2.0%                          | 2.2%                           | <.001                      |
| Prior Minor Amputation                  | 5.4%                         | 4.4%                          | 3.4%                           | <.001                      |
| Prior PCI                               | 15.8%                        | 14.6%                         | 15.4%                          | 0.302                      |
| Prior CABG                              | 11.6%                        | 10.7%                         | 11.0%                          | 0.374                      |

| <b>Characteristic</b>                     | <b>0 to 60<br/>(N=4,683)</b> | <b>61 to 79<br/>(N=3,866)</b> | <b>80 to 100<br/>(N=4,984)</b> | <b>P-value<sup>α</sup></b> |
|-------------------------------------------|------------------------------|-------------------------------|--------------------------------|----------------------------|
| <b>Medical History</b>                    |                              |                               |                                |                            |
| Stroke                                    | 10.8%                        | 7.4%                          | 6.3%                           | <.001                      |
| Myocardial Infarction                     | 19.8%                        | 17.9%                         | 16.6%                          | <.001                      |
| Diabetes                                  | 40.2%                        | 38.5%                         | 36.2%                          | <.001                      |
| Hypertension                              | 79.3%                        | 79.0%                         | 76.7%                          | 0.004                      |
| Hyperlipidemia                            | 73.6%                        | 75.7%                         | 77.5%                          | <.001                      |
| COPD                                      | 13.6%                        | 11.1%                         | 9.0%                           | <.001                      |
| Number of Vascular Beds                   |                              |                               |                                | <.001                      |
| 1                                         | 53.3%                        | 56.9%                         | 59.0%                          |                            |
| ≥2                                        | 46.7%                        | 43.2%                         | 41%                            |                            |
| Tobacco Use                               |                              |                               |                                | <.001                      |
| Current                                   | 31.2%                        | 30.8%                         | 30.9%                          |                            |
| Former                                    | 42.7%                        | 48.3%                         | 50.8%                          |                            |
| <b>Medications Prior to Randomization</b> |                              |                               |                                |                            |
| Aspirin                                   | 64.2%                        | 65.1%                         | 70.2%                          | <.001                      |
| Clopidogrel                               | 32.8%                        | 31.8%                         | 32.2%                          | 0.599                      |
| Statin                                    | 70.4%                        | 73.3%                         | 75.4%                          | <.001                      |
| Ace Inhibitor                             | 42.3%                        | 41.4%                         | 39.4%                          | 0.011                      |
| ARB                                       | 23.7%                        | 25.1%                         | 25.6%                          | 0.073                      |



| <b>Characteristic</b> | <b>0 to 60<br/>(N=4,683)</b> | <b>61 to 79<br/>(N=3,866)</b> | <b>80 to 100<br/>(N=4,984)</b> | <b>P-value<sup>α</sup></b> |
|-----------------------|------------------------------|-------------------------------|--------------------------------|----------------------------|
| Cilostazol            | 12.9%                        | 14.5%                         | 16.3%                          | <.001                      |

ABI indicates ankle brachial index; ACE, angiotensin converting enzyme; ARB, angiotensin II receptor blocker; CABG, coronary artery bypass grafting; COPD; chronic obstructive pulmonary disease; kg, kilogram; PCI, percutaneous coronary intervention; SD, standard deviation; TBI, toe brachial index

<sup>α</sup>Continuous variables were compared using an ANOVA or Kruskal Wallis test and categorical variables were compared using chi-square or Fisher's exact test.

**Table S4. Baseline Characteristics by Tertile of PAQ Score.**

| <b>Characteristic</b>                   | <b>0 to 49<br/>(N=1,479)</b> | <b>50 to 75<br/>(N=1,473)</b> | <b>76 to 108<br/>(N=1,479)</b> | <b>P-value<sup>α</sup></b> |
|-----------------------------------------|------------------------------|-------------------------------|--------------------------------|----------------------------|
| Age                                     | 66, 60-73                    | 67, 62-73                     | 68, 61-73                      | <.001                      |
| Female                                  | 34.8%                        | 31.0%                         | 28.9%                          | 0.003                      |
| Weight, kg                              | 82, 70-95                    | 80, 69-92                     | 79, 68-90                      | <.001                      |
| Inclusion Criteria                      |                              |                               |                                | <.001                      |
| ABI/TBI                                 | 31.3%                        | 29.7%                         | 15.6%                          |                            |
| ABI value, Mean (SD)                    | 0.64 (0.17)                  | 0.66 (0.15)                   | 0.67 (0.16)                    | 0.012                      |
| TBI value, Mean (SD)                    | 0.46 (0.15)                  | 0.37 (0.15)                   | 0.37 (0.20)                    | 0.388                      |
| Prior lower extremity revascularization | 68.7%                        | 70.3%                         | 84.4%                          |                            |
| ABI value, Mean (SD)                    | 0.77 (0.22)                  | 0.81 (0.21)                   | 0.88 (0.20)                    | <.001                      |
| Limb Symptoms                           |                              |                               |                                | <.001                      |
| Asymptomatic                            | 5.5%                         | 14.7%                         | 49.6%                          |                            |
| Mild or Moderate Claudication           | 50.2%                        | 63.7%                         | 44.3%                          |                            |
| Severe Claudication                     | 37.3%                        | 20.0%                         | 4.4%                           |                            |
| Pain while at Rest                      | 5.3%                         | 1.0%                          | 1.2%                           |                            |
| Major or Minor Tissue Loss              | 1.6%                         | 0.4%                          | 0.6%                           |                            |
| Prior Major Amputation                  | 2.6%                         | 1.2%                          | 1.3%                           | 0.002                      |
| Prior Minor Amputation                  | 3.8%                         | 2.7%                          | 2.1%                           | 0.020                      |
| Prior PCI                               | 27.5%                        | 25.9%                         | 23.7%                          | 0.061                      |
| Prior CABG                              | 20.6%                        | 20.0%                         | 15.4%                          | <.001                      |

| <b>Characteristic</b>                     | <b>0 to 49<br/>(N=1,479)</b> | <b>50 to 75<br/>(N=1,473)</b> | <b>76 to 108<br/>(N=1,479)</b> | <b>P-value<sup>α</sup></b> |
|-------------------------------------------|------------------------------|-------------------------------|--------------------------------|----------------------------|
| <b>Medical History</b>                    |                              |                               |                                |                            |
| Stroke                                    | 7.6%                         | 6.7%                          | 5.5%                           | 0.070                      |
| Prior Myocardial Infarction               | 23.9%                        | 23.2%                         | 19.3%                          | 0.006                      |
| Diabetes                                  | 45.2%                        | 39.3%                         | 31.8%                          | <.001                      |
| Hypertension                              | 85.2%                        | 83.7%                         | 80.0%                          | <.001                      |
| Hyperlipidemia                            | 89.9%                        | 88.5%                         | 87.5%                          | 0.110                      |
| COPD                                      | 24.7%                        | 17.7%                         | 10.7%                          | <.001                      |
| Number of Vascular Beds                   |                              |                               |                                | <.001                      |
| 1                                         | 42.6%                        | 43.3%                         | 49.5%                          |                            |
| ≥2                                        | 57.4%                        | 56.7%                         | 50.5%                          |                            |
| Tobacco Use                               |                              |                               |                                | 0.030                      |
| Current                                   | 37.9%                        | 33.6%                         | 32.8%                          |                            |
| Former                                    | 50.5%                        | 55.1%                         | 55.0%                          |                            |
| <b>Medications Prior to Randomization</b> |                              |                               |                                |                            |
| Aspirin                                   | 73.8%                        | 78.3%                         | 81.9%                          | <.001                      |
| Clopidogrel                               | 43.7%                        | 38.5%                         | 42.6%                          | 0.011                      |
| Statin                                    | 83.4%                        | 83.4%                         | 85.9%                          | 0.092                      |
| Ace Inhibitor                             | 45.0%                        | 43.0%                         | 43.0%                          | 0.434                      |
| ARB                                       | 25.3%                        | 26.1%                         | 23.9%                          | 0.380                      |

| <b>Characteristic</b> | <b>0 to 49<br/>(N=1,479)</b> | <b>50 to 75<br/>(N=1,473)</b> | <b>76 to 108<br/>(N=1,479)</b> | <b>P-value<sup>α</sup></b> |
|-----------------------|------------------------------|-------------------------------|--------------------------------|----------------------------|
| Cilostazol            | 14.3%                        | 13.8%                         | 9.5%                           | <.001                      |

ABI indicates ankle brachial index; ACE, angiotensin converting enzyme; ARB, angiotensin II receptor blocker; CABG, coronary artery bypass grafting; COPD; chronic obstructive pulmonary disease; kg, kilogram; PCI, percutaneous coronary intervention; SD, standard deviation; TBI, toe brachial index

<sup>α</sup>Continuous variables were compared using an ANOVA or Kruskal Wallis test and categorial variables were compared using chi-square or Fisher's exact test.

**Table S5. Trends in Health status Measures over the Trial Follow-up.**

| <b>Measure</b>                   | <b>Baseline</b> | <b>Month 12</b> | <b>Month 24</b> |
|----------------------------------|-----------------|-----------------|-----------------|
| <b>EQ-5D Index Score</b>         |                 |                 |                 |
| N                                | 9979            | 9979            | 9979            |
| Mean (SD)                        | 0.73 (0.19)     | 0.76 (0.19)     | 0.76 (0.19)     |
| Median (IQR)                     | 0.73, 0.66-0.85 | 0.73, 0.69-0.85 | 0.73, 0.69-0.85 |
| <b>EQ-5D Visual Analog Scale</b> |                 |                 |                 |
| N                                | 10443           | 10443           | 10443           |
| Mean (SD)                        | 68.7 (19.5)     | 70.4 (18.7)     | 70.9 (18.9)     |
| Median (IQR)                     | 70, 60-80       | 72, 60-80       | 75, 60-80       |
| <b>PAQ</b>                       |                 |                 |                 |
| N                                | 3225            | 3225            | 3225            |
| Mean (SD)                        | 62.97 (24.2)    | 66.81 (24.3)    | 67.57 (24.8)    |
| Median (IQR)                     | 65, 44-83       | 69, 50-87       | 71, 50-89       |

EQ-5D indicates EuroQol 5-Dimensions; IQR, interquartile range; PAQ, Peripheral Artery Questionnaire; SD, standard deviation

**Table S6. Number of Clinical Events by Tertile of Health Status Instrument.**

| <b>Event Rates by Tertile of Health Status Instrument Score</b> |                                     |                                    |                                    |
|-----------------------------------------------------------------|-------------------------------------|------------------------------------|------------------------------------|
| <b>Clinical Outcome</b>                                         | <b>Tertile 1*<br/>Rate (Events)</b> | <b>Tertile 2<br/>Rate (Events)</b> | <b>Tertile 3<br/>Rate (Events)</b> |
| EQ-5D (N=13,217)                                                |                                     |                                    |                                    |
| MACE                                                            | 5.32 (525)                          | 4.55 (480)                         | 3.58 (405)                         |
| MALE                                                            | 1.49 (148)                          | 1.13 (121)                         | 0.85 (98)                          |
| ALI Requiring Hospitalization                                   | 0.82 (82)                           | 0.60 (65)                          | 0.64 (74)                          |
| Major Amputation                                                | 0.86 (86)                           | 0.63 (68)                          | 0.33 (38)                          |
| LER                                                             | 5.61 (527)                          | 5.84 (588)                         | 4.89 (531)                         |
| VAS (N=13,533)                                                  |                                     |                                    |                                    |
| MACE                                                            | 5.72 (624)                          | 4.20 (392)                         | 3.65 (445)                         |
| MALE                                                            | 1.59 (176)                          | 1.24 (117)                         | 0.81 (101)                         |
| ALI Requiring Hospitalization                                   | 0.87 (97)                           | 0.70 (67)                          | 0.51 (64)                          |
| Major Amputation                                                | 0.93 (104)                          | 0.66 (63)                          | 0.38 (48)                          |
| LER                                                             | 6.16 (638)                          | 5.25 (470)                         | 4.99 (583)                         |
| PAQ (N=4,431)                                                   |                                     |                                    |                                    |
| MACE                                                            | 7.24 (249)                          | 5.20 (186)                         | 3.48 (129)                         |
| MALE                                                            | 1.51 (54)                           | 0.87 (32)                          | 0.83 (31)                          |
| ALI Requiring Hospitalization                                   | 0.86 (31)                           | 0.57 (21)                          | 0.66 (25)                          |
| Major Amputation                                                | 0.75 (27)                           | 0.48 (18)                          | 0.24 (9)                           |

| <b>Event Rates by Tertile of Health Status Instrument Score</b> |                                     |                                    |                                    |
|-----------------------------------------------------------------|-------------------------------------|------------------------------------|------------------------------------|
| <b>Clinical Outcome</b>                                         | <b>Tertile 1*<br/>Rate (Events)</b> | <b>Tertile 2<br/>Rate (Events)</b> | <b>Tertile 3<br/>Rate (Events)</b> |
| LER                                                             | 12.8 (392)                          | 9.22 (304)                         | 6.82 (236)                         |

ALI indicates acute limb ischemia; EQ-5D, EuroQol-5D; HR, hazards ratio; LER, lower extremity revascularization; MACE, major adverse cardiovascular event; MALE, major adverse limb event; PAQ, peripheral artery questionnaire; VAS, visual analog scale

Tertile 1 is defined as 0-<0.69 for EQ-5D Index Score, 0.69-<0.79 for Tertile 2, and from 0.79-1.0 for Tertile 3. Tertile 1 is defined as 0-60 for VAS, 61-79 for Tertile 2, and 80-100 for Tertile 3. Tertile 1 is defined as 0-49 for PAQ, 50-75 for Tertile 2, and 76-108 for Tertile 3.

**Table S7. Baseline Characteristics of Patients Included vs. Excluded from Change Analysis.**

| <b>Characteristic</b>                      | <b>Excluded from Analysis<br/>(N=1669)</b> | <b>Included in Analysis<br/>(N=11913)</b> |
|--------------------------------------------|--------------------------------------------|-------------------------------------------|
| Age                                        | 68, 62-75                                  | 66, 60-72                                 |
| Female                                     | 29.8%                                      | 28.1%                                     |
| Weight, kg                                 | 76, 65-87                                  | 77, 67-88                                 |
| <b>Inclusion Criteria</b>                  |                                            |                                           |
| ABI/TBI                                    | 43.9%                                      | 43.8%                                     |
| Prior lower extremity<br>revascularization | 56.1%                                      | 56.2%                                     |
| <b>Limb Symptoms</b>                       |                                            |                                           |
| Asymptomatic                               | 16.1%                                      | 18.9%                                     |
| Mild or Moderate Claudication              | 47.1%                                      | 54.1%                                     |
| Severe Claudication                        | 28.4%                                      | 22.9%                                     |
| Pain while at Rest                         | 4.6%                                       | 2.5%                                      |
| Minor Tissue Loss                          | 2.9%                                       | 1.3%                                      |
| Major Tissue Loss                          | 1.0%                                       | 0.3%                                      |
| Prior Major Amputation                     | 3.5%                                       | 2.3%                                      |
| Prior Minor Amputation                     | 6.6%                                       | 4.1%                                      |
| Prior PCI                                  | 16.7%                                      | 15.1%                                     |
| Prior CABG                                 | 13.5%                                      | 10.8%                                     |
| <b>Medical History</b>                     |                                            |                                           |
| Stroke                                     | 9.1%                                       | 960 (8.1%)                                |



| <b>Characteristic</b>                     | <b>Excluded from Analysis<br/>(N=1669)</b> | <b>Included in Analysis<br/>(N=11913)</b> |
|-------------------------------------------|--------------------------------------------|-------------------------------------------|
| CAD                                       | 31.9%                                      | 28.3%                                     |
| MI                                        | 20.6%                                      | 17.8%                                     |
| Diabetes                                  | 41.5%                                      | 37.8%                                     |
| Hypertension                              | 79.2%                                      | 78.1%                                     |
| Hyperlipidemia                            | 74.8%                                      | 75.8%                                     |
| COPD                                      | 13.5%                                      | 10.8%                                     |
| Liver Disease                             | 2.0%                                       | 2.0%                                      |
| Number of Vascular Beds                   |                                            |                                           |
| 1                                         | 53.9%                                      | 56.8%                                     |
| 2                                         | 34.3%                                      | 33.5%                                     |
| 3                                         | 11.7%                                      | 9.8%                                      |
| Tobacco Use                               |                                            |                                           |
| Current                                   | 29.9%                                      | 31.1%                                     |
| Former                                    | 46.3%                                      | 47.4%                                     |
| <b>Medications Prior to Randomization</b> |                                            |                                           |
| Aspirin                                   | 66.2%                                      | 66.7%                                     |
| Clopidogrel                               | 33.6%                                      | 32.1%                                     |
| Statin                                    | 69.6%                                      | 73.6%                                     |
| ACE Inhibitor                             | 41.3%                                      | 41.0%                                     |
| ARB                                       | 24.0%                                      | 24.9%                                     |

| <b>Characteristic</b> | <b>Excluded from Analysis<br/>(N=1669)</b> | <b>Included in Analysis<br/>(N=11913)</b> |
|-----------------------|--------------------------------------------|-------------------------------------------|
| Cilostazol            | 16.4%                                      | 14.3%                                     |

ABI indicates ankle brachial index; ACE, angiotensin converting enzyme; ARB, angiotensin II receptor blocker; CABG, coronary artery bypass grafting; CAD, coronary artery disease; COPD; chronic obstructive pulmonary disease; kg, kilogram; MI; myocardial infarction; PCI, percutaneous coronary intervention; SD, standard deviation; TBI, toe brachial index

**Figure S1. Boxplot of Change in Health Status Instrument Scores at the 12 Month and 24 Month Trial Follow-up (1a- EQ-5D, 1b- EQ VAS, 1c- PAQ).**

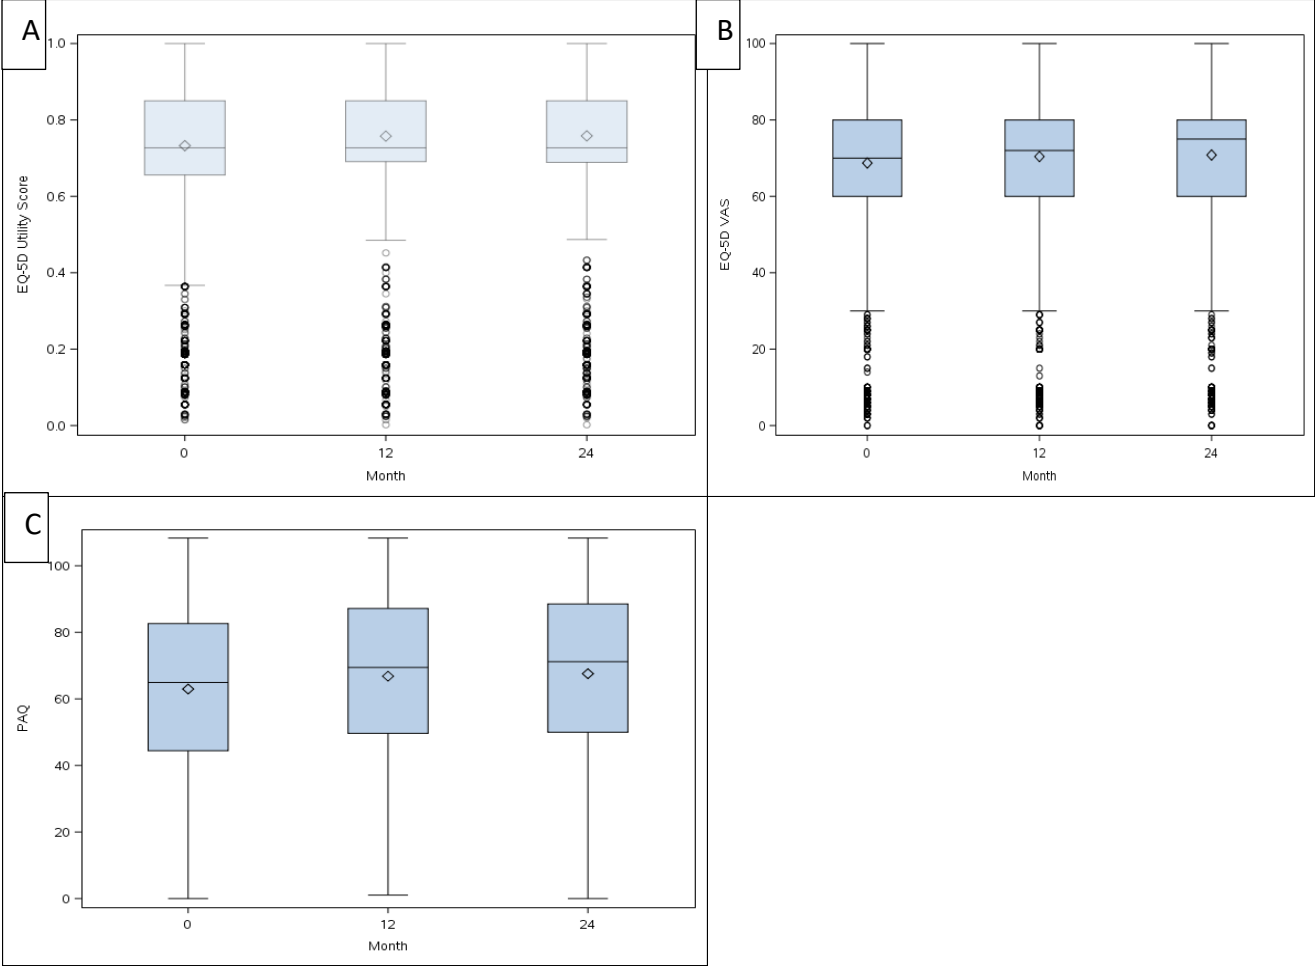

The boxplots illustrate the change in the various health status instruments scores at baseline, 12-month follow-up and at 24 months follow-up. Each boxplot illustrates the minimum and maximum scores, the median score, and the interquartile range.
